# Supplementary material for: A role for mitotic bookmarking of SOX2 in pluripotency and differentiation
Source: PubMed Central journal article supplement — Genes Dev. 2016 Nov 15;30(22):2538–50. doi: 10.1101/gad.289256.116 (PMC5159668; doi:10.1101/gad.289256.116), 2016-11-15
Supplement: supp_gad.289256.116_Supplemental_Figures.pdf [file supp_gad.289256.116_Supplemental_Figures.pdf]

**Figure S1: Interphase localization of YPet-fused transcription factors and additional control immunofluorescence and SNAP-tag fusion imaging, related to Fig.1**

**A**

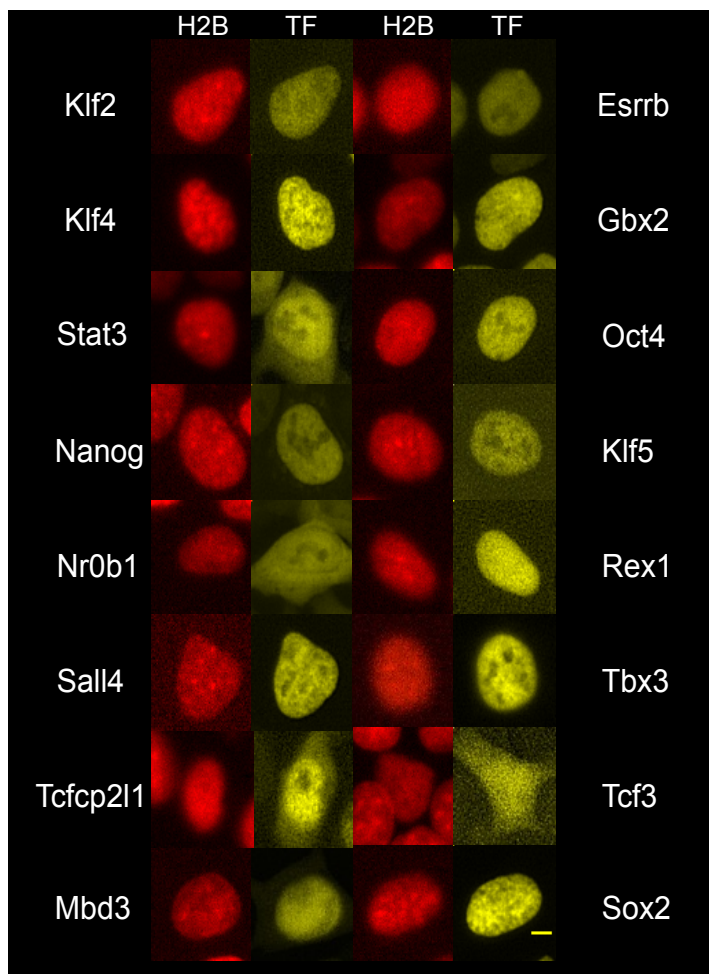

**B**

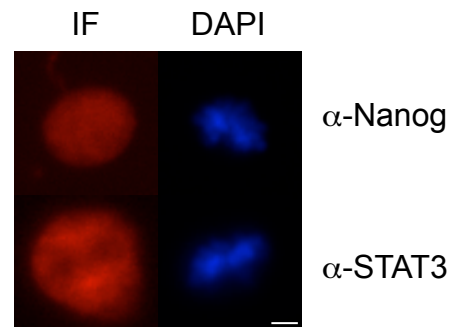

**C**

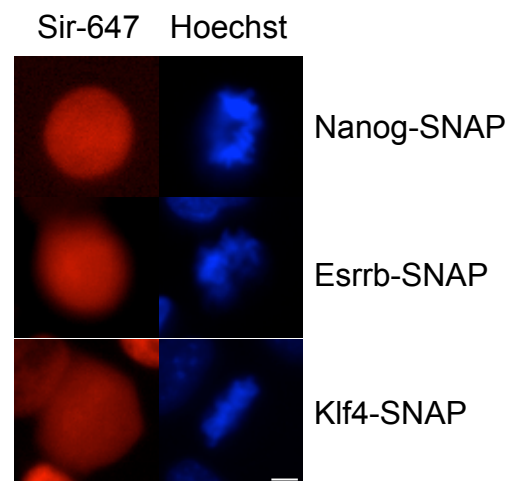

(A) Interphase localization of pluripotency transcription factors (TF) fused to Ypet. (B) Metaphase cells staining with a Nanog or STAT3 antibody. (C) Snapshots of metaphase cells of dox-inducible Esrrb-SNAP, Nanog-SNAP and Klf4-SNAP ES cell lines labeled with SNAP SiR-647 and Hoechst. Scale bars: 5 $\mu$ m. IF: immunofluorescence channel.

**Figure S2: Confocal imaging of mitotic chromosome binding in ES cells, related to Fig.1 and 2**

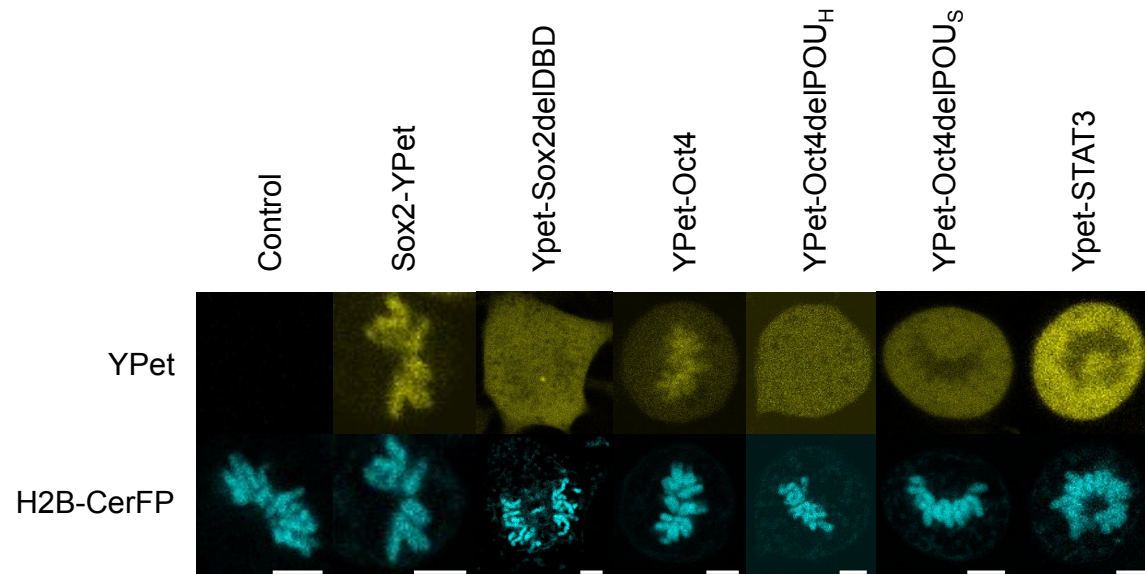

ES cell lines expressing H2BCerFP and different doxycycline-inducible YPet fusion proteins were plated on E-cadherin-coated dishes in medium containing 100ng/ml of doxycycline and imaged by confocal microscopy 24 hours later. Scale bars: 5 $\mu$ m.

**Figure S3: Genomic analysis of Sox2-luciferase and Luciferase-Oct4 knock-in ES cells, related to Fig.1**

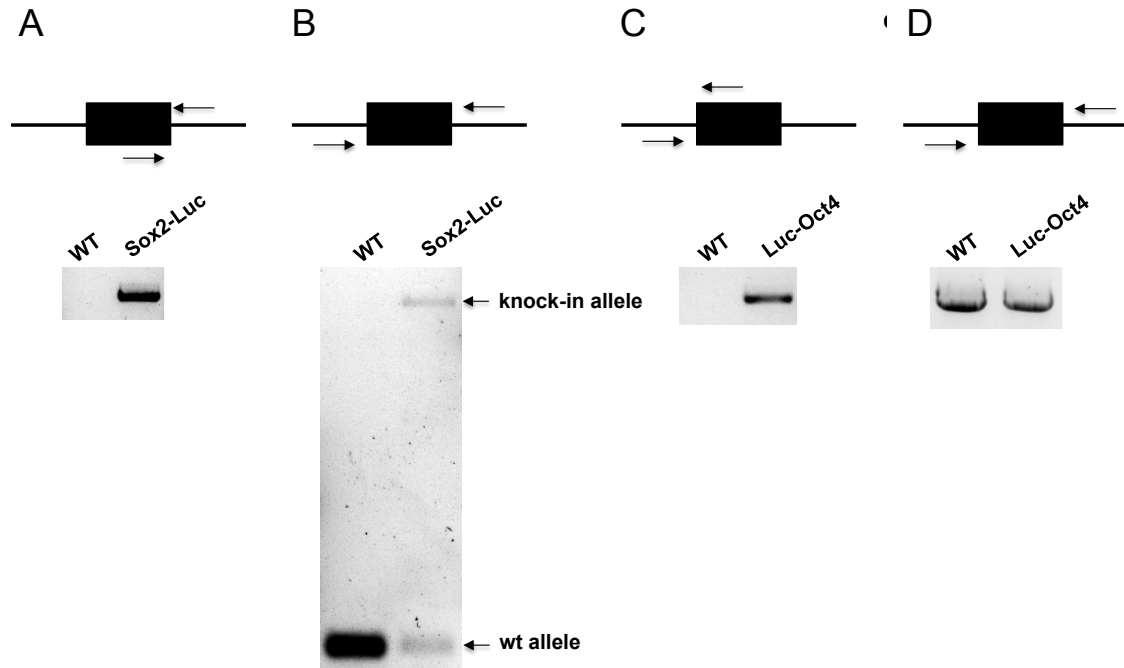

PCR analysis of the genomic insertion sites for the knock-in cassettes of Sox2-Luc (A-B) and Luc-Oct4 (C-D). The black boxes represents the knock-in cassette with homology arms to the targeted region. The black line represents flanking genomic regions of the expected insertion sites for Sox2 and Oct4. Note that for Luc-Oct4, we were unable to amplify the whole knock-in cassette (expected product size: 5.2kb), thus only the PCR product for the wild type (wt) allele can be seen.

**Figure S4: DNA residence time extraction from single molecule imaging experiments, related to Fig.4**

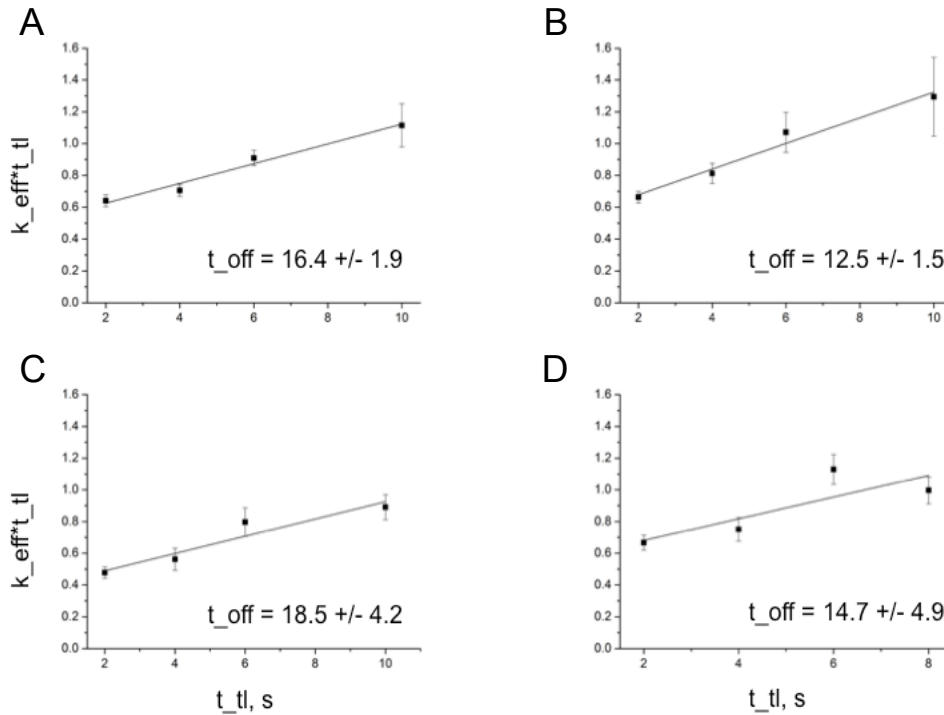

The effective residence time ( $t_{eff}$ ) that we measured in single molecule tracking experiments is a function of transcription factor residence time ( $t_{off}$ ) and fluorophore bleaching ( $t'_{bleach}$ ):

$$k_{eff} = k_{off} + k_{bleach};$$

$$\frac{1}{t_{eff}} = \frac{1}{t_{off}} + \frac{1}{t'_{bleach}};$$

As we vary the dark time, or gaps between images ( $t_{gap}$ ), fluorophore bleaching ( $t'_{bleach}$ ) and the effective residence time ( $t_{eff}$ ) vary with a rate that depends on the time-lapse parameters ( $t_{int}$  - image acquisition time):

$$t_{tl} = t_{int} + t_{gap}, t_{int} = 2 \text{ s (const)};$$

$$t'_{bleach} = \frac{t_{tl}}{t_{int}} t_{bleach}, t_{bleach} = (\text{const});$$

$$\frac{1}{t_{eff}} = \frac{1}{t_{off}} + \frac{t_{int}}{t_{tl}} \frac{1}{t_{bleach}};$$

Measuring the effective binding time for different gap conditions thus allows us to extract the true binding time  $t_{off}$  as a linear regression coefficient according to the equation below.

$$k_{eff} t_{tl} = \frac{1}{t_{off}} t_{tl} + \frac{1}{t_{bleach}} t_{int};$$

as shown here for (A) Sox2 in interphase; (B) Sox2 in M-phase; (C) Oct4 in interphase; (D) Oct4 in M-phase.  $N \geq 3$  for each  $t_{tl}$  condition condition.

**Figure S5: Quality control of mitotic cell sorting and chromatin fragmentation, related to Fig.5**

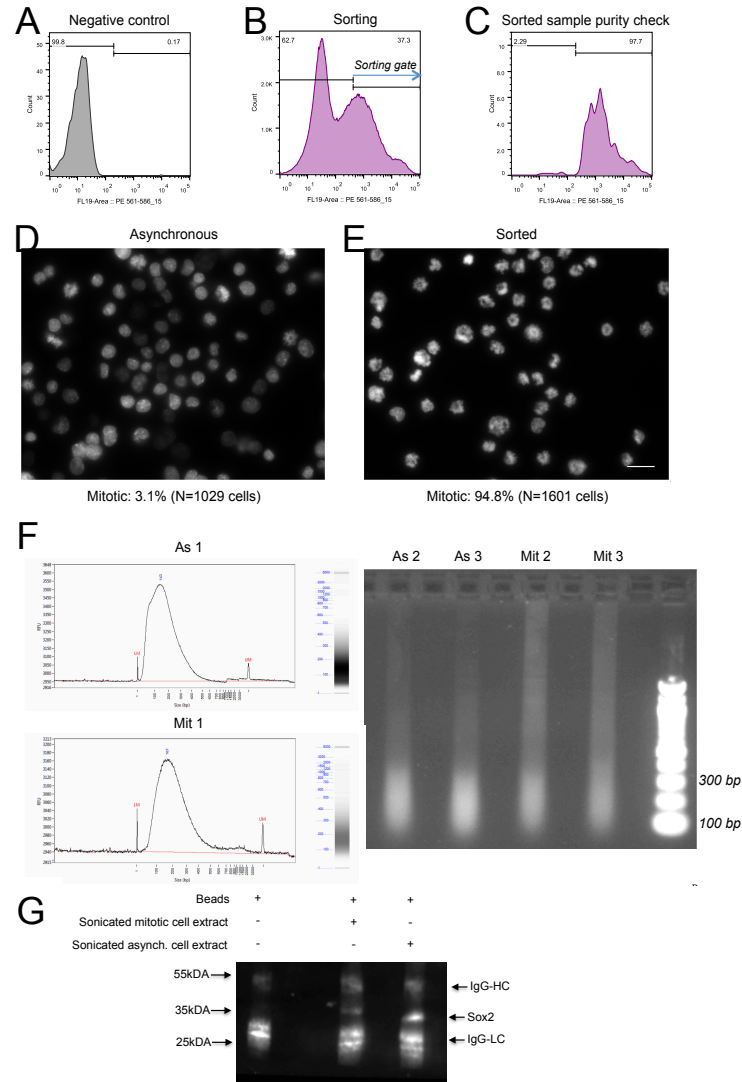

(A) Negative control cells stained with secondary antibody alone. (B) Sorting window for H3S10<sup>P</sup>-positive cells after nocodazole synchronization. (C) Reanalysis of sorted sample to determine the purity of H3S10<sup>P</sup>-positive cells (97.7%). (D-E) DAPI staining of asynchronous (D) and H3S10<sup>P</sup>-sorted cells (E) to quantify the fraction of mitotic cells with condensed chromatin. Scale bar: 20  $\mu$ m. (F) Sonication profiles of fragmented chromatin from asynchronous (As) and sorted mitotic (Mit) cells used for downstream ChIP-seq experiments. The first replicate for each condition was analyzed on a Fragment Analyzer and the two remaining replicates on a 1% agarose gel. (G) Western blotting against Sox2 after boiling antibody-bound beads incubated with sonicated extracts from mitotic or asynchronous cells. Antibody-bound beads were used as negative control. LC: light chains; HC: heavy chains.

Figure S6: Peak calling and selection, related to Fig.5

A

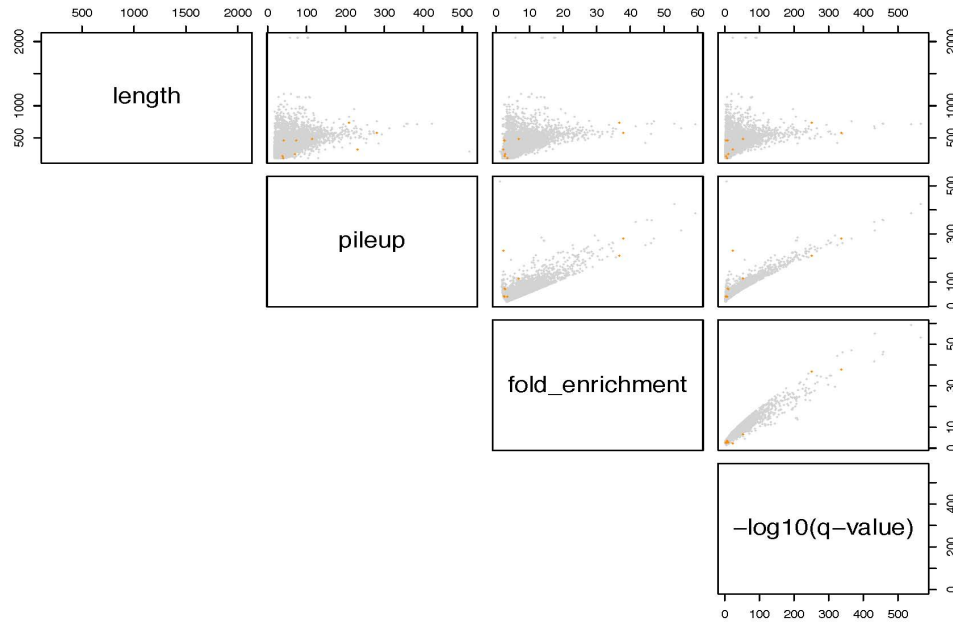

B

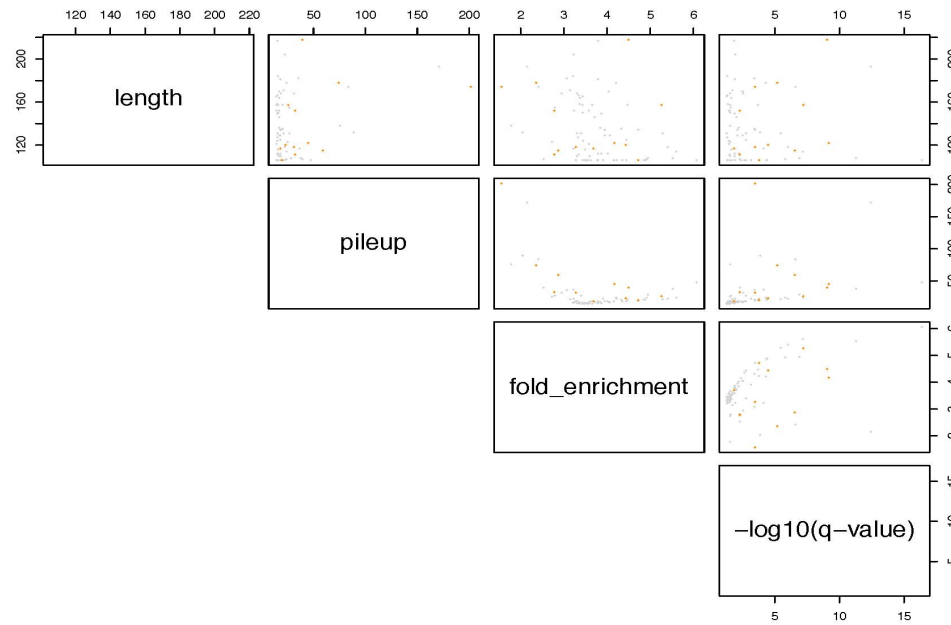

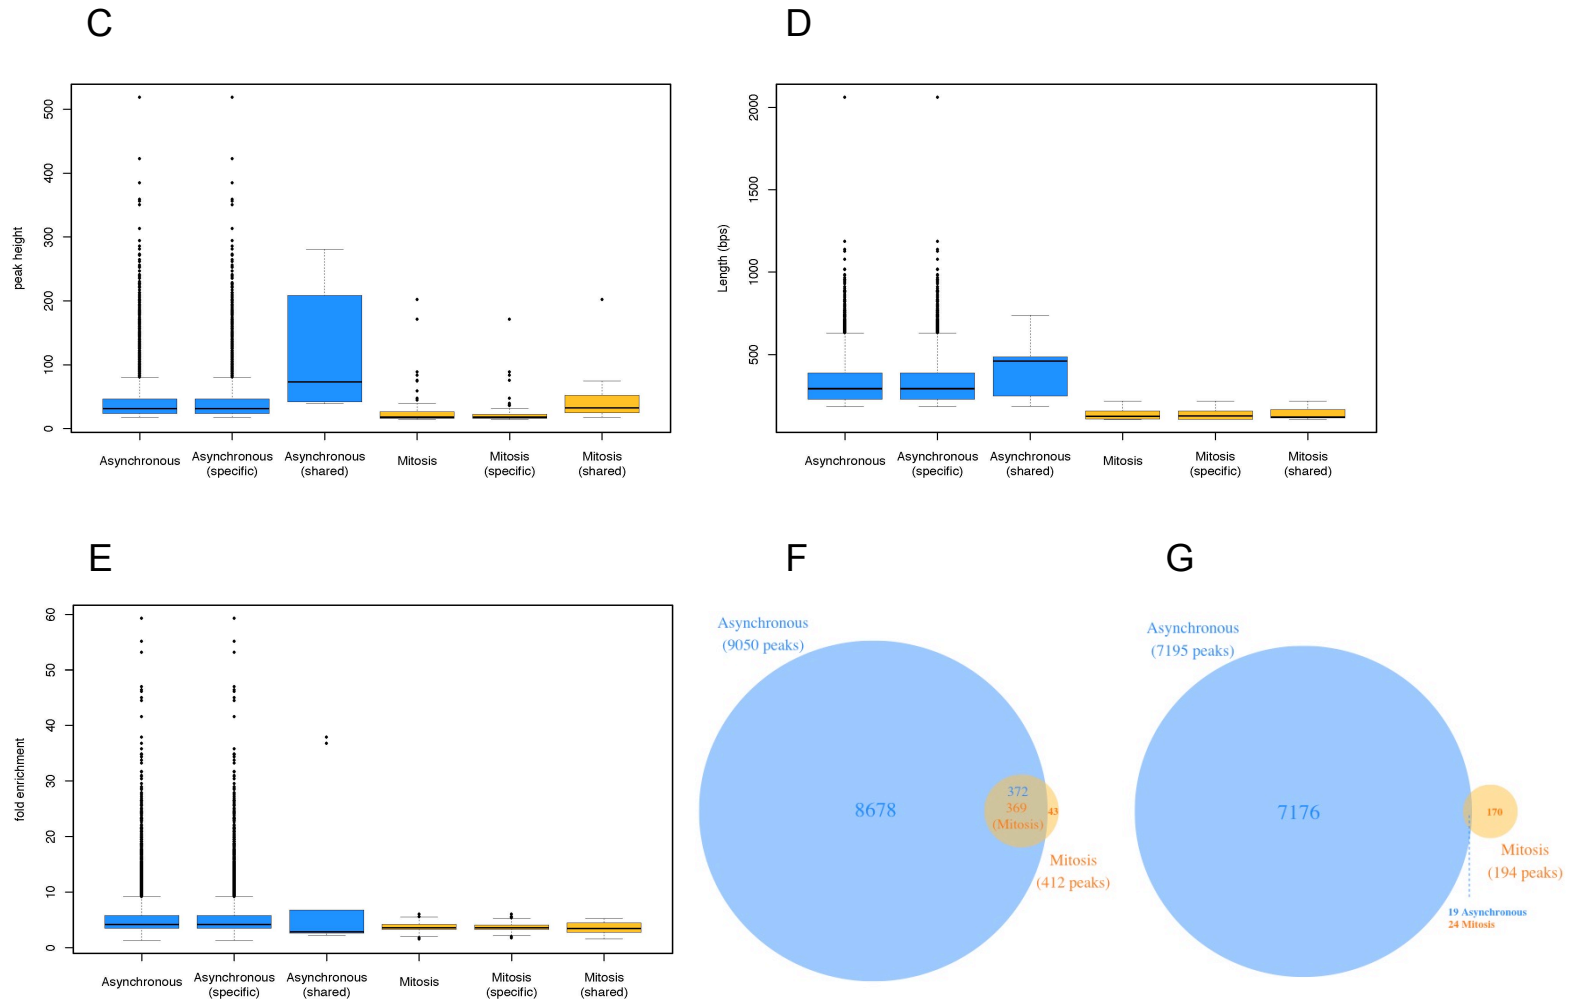

(A-B) Peak characteristics of asynchronous (A) and mitotic (B) ChIP-seq samples. Gray: selected peaks; Red: blacklisted peaks. (C-E) 25<sup>th</sup>-75<sup>th</sup> percentile box-plots of peak height (C), peak lengths (D), and peak fold-enrichment (E) of different classes of peaks as indicated on the x-axis. Whiskers: 1/-1.5 IQR; black line: median. (F-G) Number of asynchronous and mitotic peaks detected for FoxA1 (Caravaca et al. 2013) (F) and GATA1 (Kadauke et al.) (G) using our analytical pipeline.

**Figure S7: Relative enrichment of called peaks, related to Fig.5**

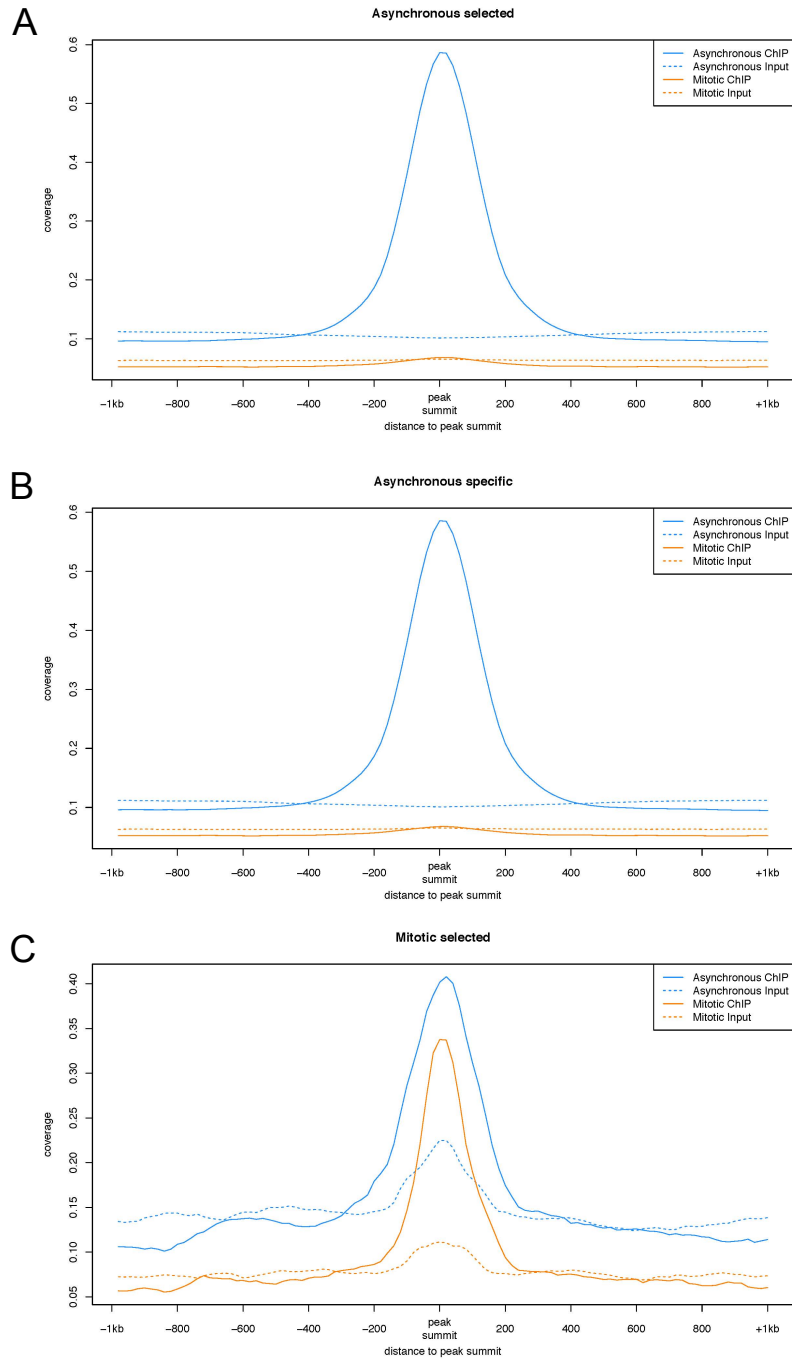



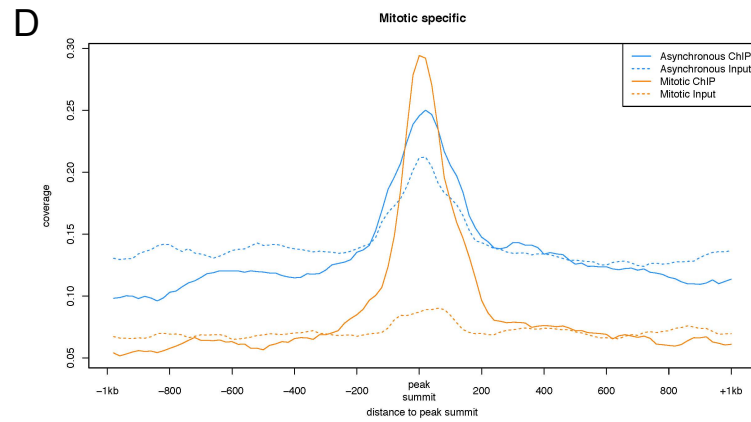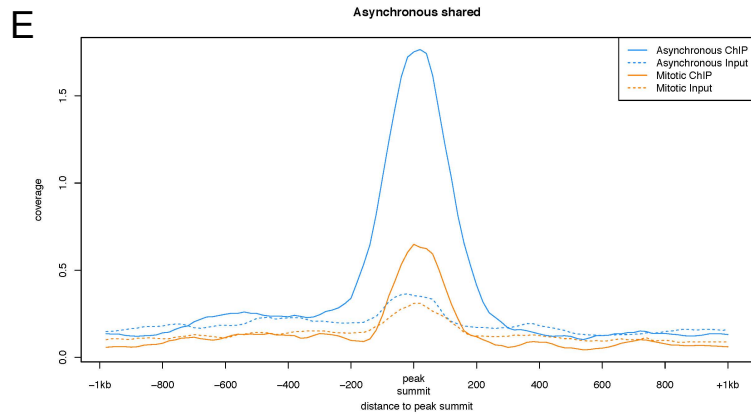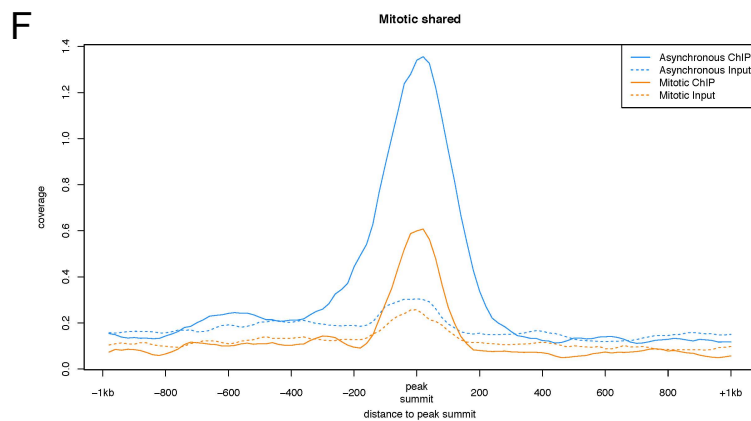

(A-B) Peak characteristics of asynchronous (A) and mitotic (B) ChIP-seq samples. Gray: selected peaks; Red: blacklisted peaks. (C-E) 25th-75th percentile box-plots of peak height (C), peak lengths (D), and peak fold-enrichment (E) of different classes of peaks as indicated on the x-axis. Whiskers:  $\pm 1.5$  IQR; black line: median.

**Figure S8: ChIP-QPCR on selected peaks and negative control regions, related to Fig.5**

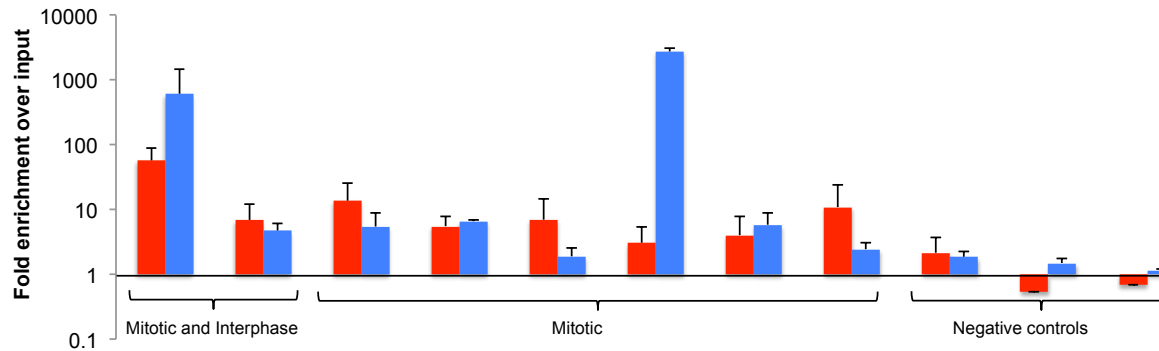

QPCR primers were designed around the center of peaks called by MACS2, for 2 peaks common to mitotic and asynchronous samples, 6 peaks called only in mitosis, and 3 regions where no peaks were called. Red: Asynchronous ChIP, N=2. Blue: Mitotic ChIP, N=2. Error bars: SE. The primer pairs used for amplification are listed in Table S3.

**Figure S9: Genome-wide distribution of ChIP-seq peaks, related to Fig.5**

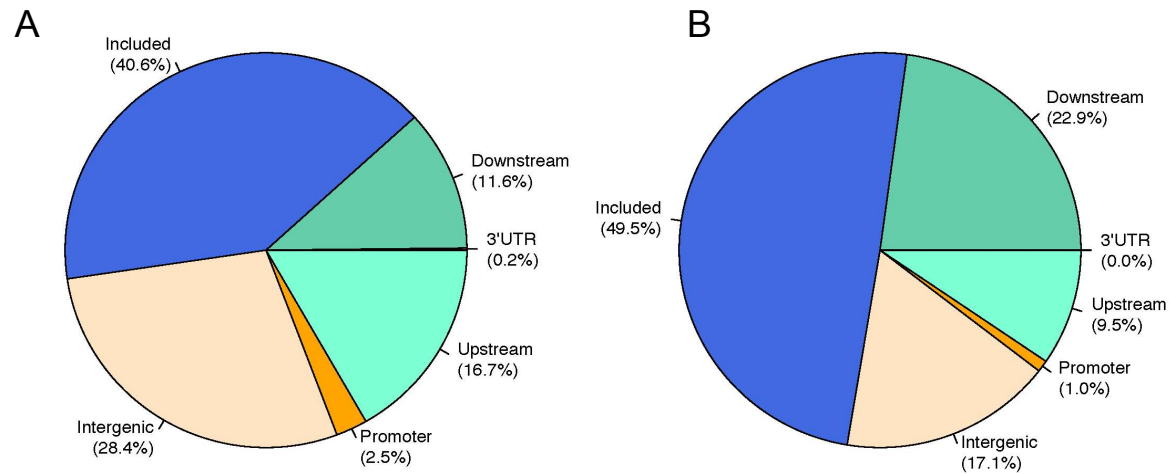

(A) Asynchronous samples. (B) Mitotic samples. Intergenic: regions without genes within a distance of 20kb; Promoter regions: upstream and within 2kb of the gene start; Upstream: between 2kb and 20kb upstream of transcription start sites; Included: within genes; 3'UTR: downstream and within 10% of the distance to the next downstream gene; Downstream: downstream of 3'UTR but at a distance of < 20kb to the closest downstream gene.

**Figure S10: De novo motif identification with MEME in the asynchronous sample, related to Fig.5**

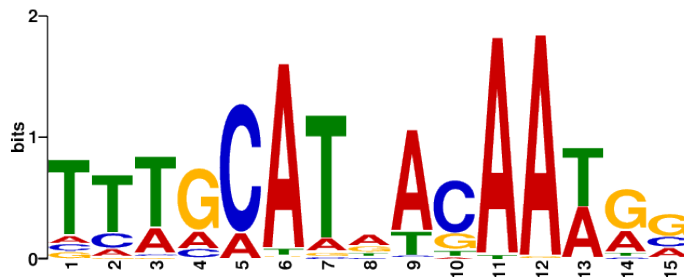

Top-scoring motif in the asynchronous samples, centered on peaks, matching the known Oct4::Sox2 composite binding motif (e-value =  $4.1 \times 10^{-343}$ ).

**Figure S11: Sorting strategies for the Sox2 overexpressing cell lines, related to Fig.6 and Fig.7**

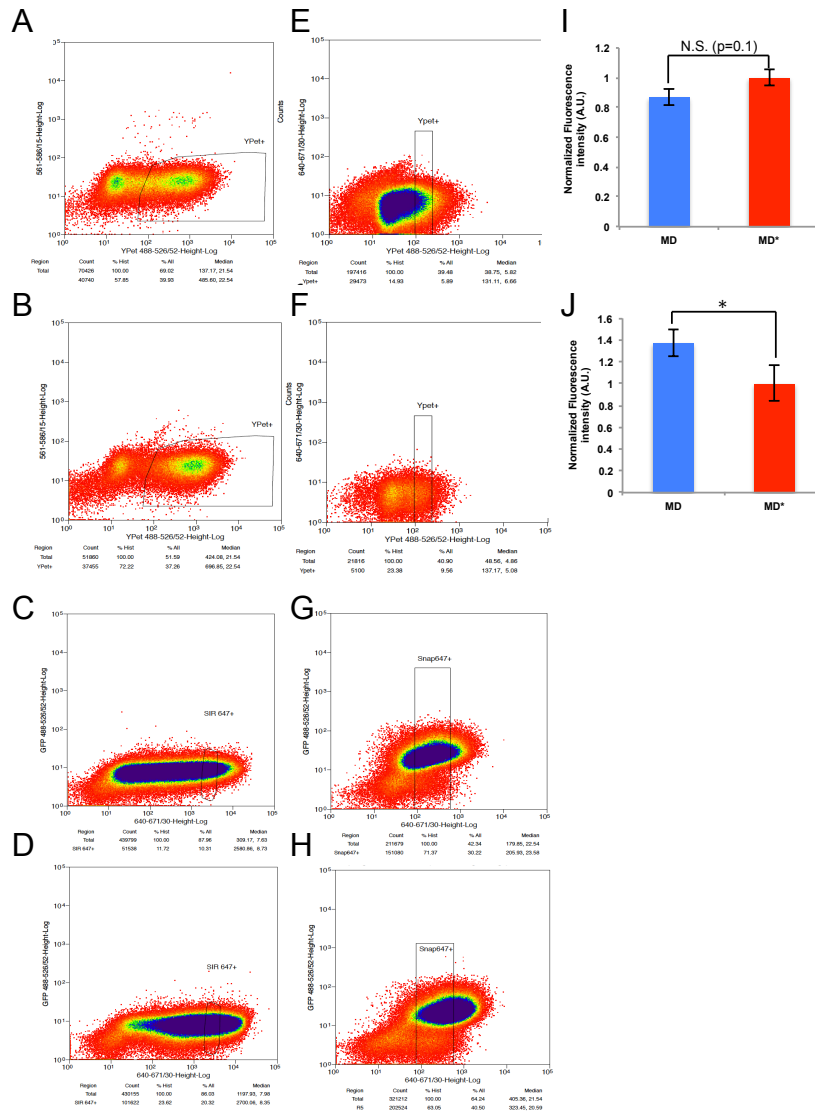

(A-H) Sorting windows of the different cell lines by FACS. (A) TRE3G-Sox2-YPet-MD (B) TRE3G-Sox2-YPet-MD\*. (C) TRE3G-SNAP-MD-Sox2. (D) TRE3G-SNAP-MD\*-Sox2. (E) PGK-Sox2-YPet-MD. (F) PGK-Sox2-YPet-MD\*. (G) PGK-SNAP-MD-Sox2. (H) PGK-SNAP-MD\*-Sox2. (I-J): Integrated fluorescence intensity of cells was measured from time-lapse experiments, 5 frames = 25 minutes before the condensation of chromosomes became visible, using cells that were FACS-sorted using the fluorescence windows shown in (A), (B), (C) and (D). Intensities were normalized on the MD\* data. Statistical analysis was performed using student's two-tailed t-test with unequal variance. (I) TRE3G-Sox2-YPet-MD (MD; N= 105) and TRE3G-Sox2-YPet-MD\* (MD\*; N=109). (J) TRE3G-SNAP-MD-Sox2 (MD; N=100) and TRE3G-SNAP-MD\*-Sox2 (MD\*; N=102). \*p<0.05

**Figure S12: Genomic analysis of Sox1-P2A-eGFP / Brachyury-P2A-mCherry knock-in ES cells, related to Fig.7**

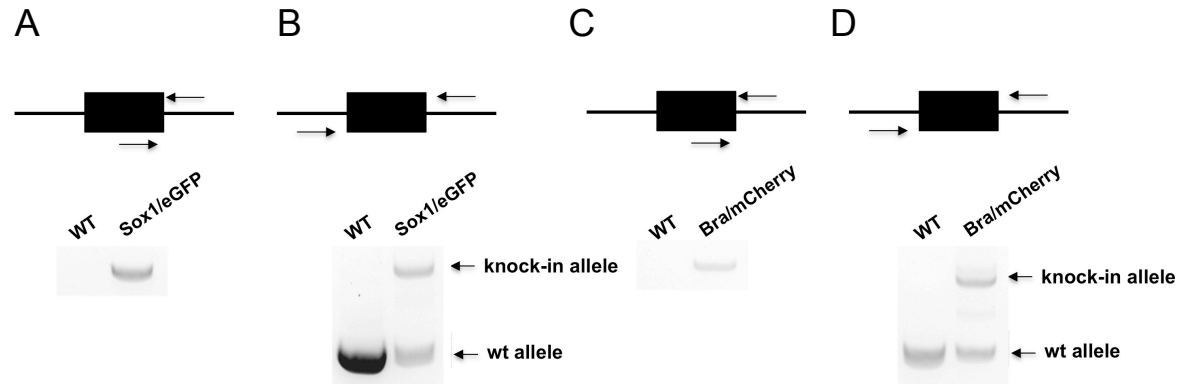

PCR analysis of the genomic insertion sites for the knock-in cassettes of Sox1-P2A-eGFP (Sox1/eGFP) (A-B) and Brachyury-P2A-mCherry (Bra/mCherry) (C-D) in the SBR cell line. The black boxes represent the knock-in cassette with homology arms to the targeted region. The black line represents flanking genomic regions of the expected insertion sites for Sox1 and Bra.
